# Supplementary material
Source: publisher figshare collection journal article supplement (https://tandf.figshare.com/ndownloader/files/21598485)
Supplement: Supplementary file 1 [file 21598485]

## Appendix: OVID search strategy for Medline to identify adverse effects

A search was performed to identify potential adverse effects of ibuprofen or paracetamol in children in the following Medline databases using the terms described in the table:

Ovid MEDILINE® Daily Update, November 4, 2008

Ovid MEDILINE® In-process & other Non-indexed Citations, November 4, 2008;

Ovid MEDILINE®, 1950 to November 4, 2008

Ovid OLDMEDILINE®, 1950 to 1965

| #  | Search History                                   |
|----|--------------------------------------------------|
| 1  | ibuprofen.mp. [mp = ti, ot, ab, nm, hw]          |
| 2  | acetaminophen.mp. [mp = ti, ot, ab, nm, hw]      |
| 3  | paracetamol.mp. [mp = ti, ot, ab, nm, hw]        |
| 4  | 1 or 2 or 3                                      |
| 5  | child\$.mp. [mp = ti, ot, ab, nm, hw]            |
| 6  | infant.mp. [mp = ti, ot, ab, nm, hw]             |
| 7  | adolescent.mp. [mp = ti, ot, ab, nm, hw]         |
| 8  | pediatric\$.mp. [mp = ti, ot, ab, nm, hw]        |
| 9  | paediatric\$.mp. [mp = ti, ot, ab, nm, hw]       |
| 10 | 5 or 6 or 7 or 8 or 9                            |
| 11 | adverse effects.mp. [mp = ti, ot, ab, nm, hw]    |
| 12 | poisoning.mp. [mp = ti, ot, ab, nm, hw]          |
| 13 | toxicity.mp. [mp = ti, ot, ab, nm, hw]           |
| 14 | chemically induced.mp. [mp = ti, ot, ab, nm, hw] |
| 15 | contraindications.mp. [mp = ti, ot, ab, nm, hw]  |
| 16 | complications.mp. [mp = ti, ot, ab, nm, hw]      |
| 17 | 11 or 12 or 13 or 14 or 15 or 16                 |
| 18 | 4 and 10 and 17                                  |
| 19 | animal/                                          |
| 20 | human/                                           |
| 21 | 19 not (19 and 20)                               |
| 22 | 18 not 21                                        |

CrossRef links are available in the online published version of this paper:

<http://www.cmrojournal.com>

Article CMRO-4925\_ESD, Accepted for publication: 15 June 2009

Published Online: 16 July 2009

doi:10.1185/03007990903116255
